# Supplementary material for: Emx2 regulates hair cell rearrangement but not positional identity within neuromasts
Source: eLife. 2020 Dec 30;9:e60432. doi: 10.7554/eLife.60432 (PMC7806267; doi:10.7554/eLife.60432)
Supplement: Figure 3—source data 1. [file elife-60432-fig3-data1.xlsx]

## Sheet: Sheet1
Figure 3--source data 1
Comparison of the emx2 log-counts in nascent HC cluster versus other clusters
nascent HC (emx2 log-counts)	other HC (emx2 log-counts)
1.81076	0.98428
1.76779	0.764832
1.85634	0.897597
0.767111	0.834257
1.0776	1.20295			Table Analyzed	Column: Entering replicate data
0.979477	1.65844
0.811139	1.36962			Column B	other HC
1.65136	1.24567			vs.	vs.
1.29005	1.12898			Column A	nHC
0.788872	1.84853
1.19784	1.71099			Unpaired t test
1.71728	1.05597			P value	0.0069
1.15378	0.995005			P value summary	**
1.15096	1.03609			Significantly different (P < 0.05)?	Yes
0.750859	0.793222			One- or two-tailed P value?	Two-tailed
1.7951	1.0522			t, df	t=2.735, df=161
1.08688	0.926737
1.49278	2.06342			How big is the difference?
0.784507	1.00632			Mean of column A	1.366
1.02911	1.12545			Mean of column B	1.17
1.66756	1.00687			Difference between means (B - A) ± SEM	-0.1953 ± 0.07139
1.46981	0.868252			95% confidence interval	-0.3363 to -0.05428
1.88409	0.779809			R squared (eta squared)	0.0444
1.35067	1.8867
1.84135	0.964161			F test to compare variances
1.69242	1.1907			F, DFn, Dfd	1.656, 29, 132
1.08016	1.09094			P value	0.0593
1.59959	0.825507			P value summary	ns
1.0003	1.0799			Significantly different (P < 0.05)?	No
2.42218	1.77285
	1.02029			Data analyzed
	0.976888			Sample size, column A	30
	1.66582			Sample size, column B	133
	1.28662
	1.6863
	0.848978
	1.54096
	1.14217
	0.960163
	1.13182
	0.978025
	0.941174
	2.06844
	1.40802
	1.53393
	1.71279
	1.47447
	1.65153
	1.18138
	2.0392
	0.932305
	1.072
	1.08273
	1.32954
	1.05732
	0.958971
	0.81519
	1.21682
	1.2345
	1.16565
	1.56131
	1.39157
	0.906123
	1.06448
	1.02462
	1.35322
	1.46467
	1.1963
	0.817867
	1.82415
	1.20099
	1.04271
	1.03422
	1.09981
	0.976785
	0.789791
	1.02336
	0.90665
	0.913748
	1.14232
	1.302
	0.892972
	0.990941
	1.23415
	0.858422
	0.844262
	1.39945
	1.02131
	0.75466
	0.82688
	1.00786
	0.968499
	0.904106
	0.927752
	1.43314
	0.768349
	0.82862
	1.54617
	0.808094
	1.01566
	1.88788
	1.18562
	1.76277
	0.942702
	1.70373
	0.911695
	0.945099
	1.31372
	0.932866
	1.20655
	0.810098
	1.11494
	1.01454
	1.71953
	0.931745
	0.92646
	1.88551
	0.958971
	0.985015
	1.12041
	1.31262
	0.851742
	0.794949
	0.788152
	1.83116
	0.974417
	1.21448
	0.938229
	1.4312
	0.99158
	0.967284
	0.961558
	1.98804
