# Supplementary material for: Emx2 regulates hair cell rearrangement but not positional identity within neuromasts
Source: eLife. 2020 Dec 30;9:e60432. doi: 10.7554/eLife.60432 (PMC7806267; doi:10.7554/eLife.60432)
Supplement: Figure 3—source data 2. [file elife-60432-fig3-data2.xlsx]

## Sheet: Sheet1
Figure 3-source data 2
Comparison of emx2-positive and -negative cells among four HC clusters
						Four groups comparison			Precursor HC vs. nascent HC					Precursor HC vs. young HC					Precursor HC vs. mature HC
						P value and statistical significance			P value and statistical significance					P value and statistical significance					P value and statistical significance
	HC precursor	nascent HC	young HC	mature HC		Test	Chi-square		Test	Chi-square				Test	Chi-square				Test	Chi-square
Emx2+ HCs	6	30	66	62		Chi-square, df	22.44, 3		Chi-square, df	15.92, 1				Chi-square, df	4.043, 1				Chi-square, df	3.294, 1
Emx2- HCs	158	147	742	753		P value	<0.0001		z	3.991				z	2.011				z	1.815
						P value summary	****		P value	<0.0001				P value	0.0444				P value	0.0695
						One- or two-sided	NA		P value summary	****				P value summary	*				P value summary	ns
						Statistically significant (P < 0.05)?	Yes		One- or two-sided	Two-sided				One- or two-sided	Two-sided				One- or two-sided	Two-sided
									Statistically significant (P < 0.05)?	Yes				Statistically significant (P < 0.05)?	Yes				Statistically significant (P < 0.05)?	No
						Data analyzed
						Number of rows	2		Data analyzed	Prec	nHC	Total		Data analyzed	Prec	yHC	Total		Data analyzed	Prec	mHC	Total
						Number of columns	4		Emx2+	6	30	36		Emx2+	6	66	72		Emx2+	6	62	68
									Emx2-	158	147	305		Emx2-	158	742	900		Emx2-	158	753	911
									Total	164	177	341		Total	164	808	972		Total	164	815	979
									Percentage of row total	Prec	nHC			Percentage of row total	Prec	yHC			Percentage of row total	Prec	mHC
									Emx2+	16.67%	83.33%			Emx2+	8.33%	91.67%			Emx2+	8.82%	91.18%
									Emx2-	51.80%	48.20%			Emx2-	17.56%	82.44%			Emx2-	17.34%	82.66%
									Percentage of column total	Prec	nHC			Percentage of column total	Prec	yHC			Percentage of column total	Prec	mHC
									Emx2+	3.66%	16.95%			Emx2+	3.66%	8.17%			Emx2+	3.66%	7.61%
									Emx2-	96.34%	83.05%			Emx2-	96.34%	91.83%			Emx2-	96.34%	92.39%
									Percentage of grand total	Prec	nHC			Percentage of grand total	Prec	yHC			Percentage of grand total	Prec	mHC
									Emx2+	1.76%	8.80%			Emx2+	0.62%	6.79%			Emx2+	0.61%	6.33%
									Emx2-	46.33%	43.11%			Emx2-	16.26%	76.34%			Emx2-	16.14%	76.92%
									nascent HC vs. young HC					nascent HC vs. mature HC
									P value and statistical significance					P value and statistical significance
									Test	Chi-square				Test	Chi-square
									Chi-square, df	12.73, 1				Chi-square, df	15.08, 1
									z	3.567				z	3.884
									P value	0.0004				P value	0.0001
									P value summary	***				P value summary	***
									One- or two-sided	Two-sided				One- or two-sided	Two-sided
									Statistically significant (P < 0.05)?	Yes				Statistically significant (P < 0.05)?	Yes
									Data analyzed	nHC	yHC	Total		Data analyzed	nHC	mHC	Total
									Emx2+	30	66	96		Emx2+	30	62	92
									Emx2-	147	742	889		Emx2-	147	753	900
									Total	177	808	985		Total	177	815	992
									Percentage of row total	nHC	yHC			Percentage of row total	nHC	mHC
									Emx2+	31.25%	68.75%			Emx2+	32.61%	67.39%
									Emx2-	16.54%	83.46%			Emx2-	16.33%	83.67%
									Percentage of column total	nHC	yHC			Percentage of column total	nHC	mHC
									Emx2+	16.95%	8.17%			Emx2+	16.95%	7.61%
									Emx2-	83.05%	91.83%			Emx2-	83.05%	92.39%
									Percentage of grand total	nHC	yHC			Percentage of grand total	nHC	mHC
									Emx2+	3.05%	6.70%			Emx2+	3.02%	6.25%
									Emx2-	14.92%	75.33%			Emx2-	14.82%	75.91%
