# Supplementary material for: Emx2 regulates hair cell rearrangement but not positional identity within neuromasts
Source: eLife. 2020 Dec 30;9:e60432. doi: 10.7554/eLife.60432 (PMC7806267; doi:10.7554/eLife.60432)
Supplement: Figure 4—source data 1. [file elife-60432-fig4-data1.xlsx]

## Sheet: Sheet1
Figure 4-source data 1
Multiple comparisons of Roll frequencies among WT, emx2 LOF and emx2 GOF HCs.
Roll (WT)	noRoll (WT)	Rollback (WT)		Roll (LOF)	noRoll (LOF)	Rollback (LOF)		Roll (GOF)	noRoll (GOF)	RollBack (GOF)
38	27	2		24	10	7		19	40	0		Test: Python Scipy package,
												stats class function ﻿chi2_contingency(data)
												p-values (Chi2 3x3: WTvs. LOFvs. GOF)	﻿4.889091458428206e-06
												post-hoc
												p-values (Chi2 2x2: WTvs. LOF)	﻿0.018765644452964463
												p-values (Chi2 2x2: WTvs. GOF)	﻿0.005545136306987293
