# Supplementary material for: Emx2 regulates hair cell rearrangement but not positional identity within neuromasts
Source: eLife. 2020 Dec 30;9:e60432. doi: 10.7554/eLife.60432 (PMC7806267; doi:10.7554/eLife.60432)
Supplement: Figure 4—source data 2. [file elife-60432-fig4-data2.xlsx]

## Sheet: Sheet1
Figure 4 source data 2
Quantification of Rock and Roll movement in WT, emx2 LOF and emx2 GOF HCs.
Rock duration ( WT) min	Roll duration (WT) min	total R&R duration (WT) min		Rock duration (LOF)	Roll duration (LOF)	total R&R duration (LOF)		Rock duration (GOF)	Roll duration (GOF)	total R&R duration (LOF)
144	72	180		96	24	120		60	114	174
84	60	120		48	54	102		114	72	186
120	36	130		78	60	144		78	114	192
144	108	210		42	42	84		114	78	192
132	30	135		66	30	96		60	114	174
102	102	170		54	42	96		54	66	120
186	84	225		24	102	126		132	96	228
114	30	120		96	42	138		90	60	150
66	138	170		36	96	132		138	132	270
102	66	168		66	54	120		66	108	174
78	66	144		18	60	78		84	126	210
48	78	126		36	48	84		36	84	120
102	48	150		114	48	162		108	132	240
66	42	108		66	42	108		102	60	162
66	120	186		24	78	102		66	114	180
132	66	198		60	60	120		84	162	246
102	24	126		24	48	72		102	72	174
132	48	180		120	66	186		144	222	366
72	60	132		90	60	144		126	198	324
78	102	180		54	102	156
108	78	186		18	96	114
60	180	240		84	96	180
138	66	204		84	96	180
78	90	168		48	72	120
18	144	162		60	84	144
42	66	108		132	66	198
18	60	78		168	54	222
30	108	144		66	54	120
96	24	120		54	42	96
126	42	168		90	72	156
102	36	138		96	72	162
66	54	120		102	36	138
84	78	162		54	42	96
66	78	144		48	24	72
114	48	162		60	54	114
66	84	150
54	96	150
96	54	150
108	60	168
120	72	192
108	96	144
72	42	114
				Rock duration (WT vs. LOF)	Roll duration (WT vs. LOF)	R&R duration (WT vs. LOF)			Rock duration (WT vs. GOF)	Roll duration (WT vs GOF)	R&R duration (WT vs. GOF)
			p-value	0.00463294	0.0701067	0.0012438		p-value	0.903888	0.00187534	0.0043851
