# Supplementary material for: Emx2 regulates hair cell rearrangement but not positional identity within neuromasts
Source: eLife. 2020 Dec 30;9:e60432. doi: 10.7554/eLife.60432 (PMC7806267; doi:10.7554/eLife.60432)
Supplement: Figure 6—source data 1. [file elife-60432-fig6-data1.xlsx]

## Sheet: Sheet1
Figure 6-source data 1
Quantification of changes in signal intensity of apical protrusion of HCs during the Rock Phase.
frame	time	WT_sample_1	WT_sample_2	WT_sample_3	WT_sample_4	WT_sample_5	LOF_sample1	LOF_sample2	LOF_sample3	LOF_sample4	LOF_sample_5	GOF_1	GOF_2	GOF_3	GOF_4	GOF_5	GOF_6
0	0	0	0	0	0	0	0	0	0	0	0	0	0	0	0	0	0
1	6	0.0690526	0.0318635	0.00140141	0.00368545	0.00989836	0.0728154	0.219762	0.0101683	0.218007	0.146776	0.00919986	0.00164674	0.000941265	0.145682	0.00922836	0.00635932
3	18	0.207188	0.086492	0.00858646	0.00686153	0.0351821	0.115153	0.197893	0.0910029	0.227059	0.209105	0.0198768	0.027207	0.00217836	0.0877555	0.0211266	0.0135183
4	24	0.165659	0.183174	0.000201804	0.0166894	0.0570817	0.172029	0.311654	0.0865873	0.275677	0.339203	0.00308069	0.0233407	0.0114431	0.0213063	0.0571839	0.0258942
5	30	0.211744	0.0314066	0.0233251	0.0732895	0.0977871	0.22536	0.305682	0.124809	0.319152	0.405599	0.0295831	0.0294265	0.0254814	0.0498702	0.0764387	0.0464827
6	36	0.261746	0.0636381	0.066043	0.0832372	0.114139	0.231971	0.253449	0.207121	0.299533	0.453649	0.0355334	0.0412401	0.024688	0.0718423	0.0527438	0.0917342
7	42	0.184385	0.149254	0.0843161	0.0926755	0.13309	0.338926	0.23343	0.168974	0.336338	0.451034	0.0604321	0.0566335	0.0233837	0.0933484	0.0668766	0.0864918
8	48	0.154334	0.130804	0.138545	0.112032	0.162012	0.252205	0.25225	0.219534	0.366169	0.405372	0.0434673	0.0740316	0.030497	0.122378	0.0548043	0.0828235
9	54	0.210132	0.153912	0.172424	0.130714	0.167003	0.264299	0.248086	0.177879	0.401131	0.376463	0.0630486	0.117849	0.0231148	0.114855	0.0509591	0.129179
10	60	0.188044	0.243944	0.163874	0.155268	0.207636	0.371555	0.293465	0.291298	0.403925	0.442462	0.048025	0.104031	0.054553	0.176843	0.0245654	0.134993
11	66	0.255154	0.196675	0.230956	0.158145	0.183972	0.343658	0.312179	0.287617	0.417326	0.41939	0.0479828	0.0611441	0.105785	0.191757	0.0608259	0.14073
12	72	0.23563	0.182247	0.322593	0.223284	0.272827	0.374097	0.305871	0.234308	0.444416	0.460355	0.0931381	0.0662991	0.103714	0.194487	0.0783395	0.139664
13	78	0.234164	0.172375	0.262845	0.202715	0.290618	0.429862	0.218059	0.317941	0.449388	0.458358	0.0866391	0.121429	0.123454	0.154271	0.0706927	0.138331
14	84	0.306585	0.168111	0.283869	0.250596	0.24897	0.443456	0.266212	0.330956	0.455167	0.429851	0.109175	0.0755352	0.126425	0.155203	0.0879886	0.181526
15	90	0.25762	0.227435	0.231006	0.276873	0.331263	0.436201	0.291383	0.336214	0.494031	0.417064	0.140783	0.10983	0.152942	0.182036	0.115209	0.161991
16	96	0.403395	0.250048	0.323669	0.301563	0.290763	0.496095	0.390277	0.381476	0.519029	0.464808	0.113774	0.157013	0.166523	0.198349	0.134305	0.179191
17	102	0.445445	0.257433	0.365518	0.342597	0.275752	0.508325	0.464989	0.350847	0.524807	0.462034	0.08934	0.162311	0.17252	0.201412	0.15382	0.170255
18	108	0.248255	0.315614	0.396529	0.413205	0.252052	0.438412	0.411662	0.411717	0.570972	0.475365	0.144835	0.183289	0.183426	0.212997	0.183842	0.266469
19	114	0.241551	0.301263	0.402929	0.499693	0.335046	0.545853	0.444529	0.422273	0.639583	0.453575	0.138336	0.182573	0.177334	0.202344	0.280246	0.161839
20	120	0.384497	0.363289	0.464014	0.350178	0.339614	0.520059	0.443519	0.386568	0.658717	0.464161	0.143822	0.197322	0.243035	0.21859	0.323558	0.331561
21	126	0.330488	0.393338	0.422009	0.38029	0.395197	0.565113	0.531857	0.411717	0.620863	0.458091	0.172519	0.154364	0.199978	0.234037	0.338025	0.23051
22	132	0.386763	0.384722	0.471109	0.326207	0.40877	0.506358	0.455926	0.463631	0.675902	0.471956	0.177878	0.196606	0.279623	0.25521	0.340143	0.17655
23	138	0.318958	0.407715	0.491411	0.448546	0.358057	0.658445	0.494512	0.437674	0.650052	0.502516	0.169185	0.198754	0.32518	0.228977	0.35371	0.319273
24	144	0.34057	0.473003	0.516223	0.416965	0.42934	0.59969	0.421692	0.508844	0.692537	0.469494	0.179946	0.19947	0.346076	0.25561	0.395862	0.238303
25	150	0.4169	0.526566	0.473926	0.382178	0.495994	0.664959	0.446211	0.484083	0.734654	0.527154	0.152135	0.195246	0.354817	0.287103	0.41532	0.290054
26	156	0.33824	0.567254	0.519507	0.35662	0.449052	0.6112	0.494259	0.489875	0.756626	0.500298	0.198263	0.169829	0.377098	0.299879	0.314258	0.589513
27	162	0.331569	0.592625	0.551327	0.408665	0.53549	0.618016	0.472937	0.510538	0.778913	0.462147	0.209875	0.214577	0.413982	0.312282	0.378435	0.580856
28	168	0.399817	0.615269	0.556196	0.500352	0.463192	0.636926	0.475082	0.531253	0.776152	0.46141	0.208375	0.22904	0.443564	0.312437	0.4353	0.558135
29	174	0.413731	0.602623	0.579981	0.392485	0.470734	0.71422	0.469699	0.559983	0.800283	0.458891	0.226353	0.274647	0.446227	0.370989	0.369439	0.566436
30	180	0.425606	0.626719	0.601621	0.440186	0.394266	0.816033	0.532201	0.552178	0.810763	0.45319	0.246352	0.236356	0.470323	0.410963	0.416538	0.676652
31	186	0.433417	0.652011	0.610221	0.470359	0.514703	0.827892	0.632913	0.590111	0.831828	0.456945	0.261152	0.253648	0.490195	0.45813	0.434052	0.572504
32	192	0.472519	0.662726	0.616667	0.501206	0.528251	0.830495	0.678137	0.598735	0.829987	0.494489	0.299879	0.267364	0.571079	0.476343	0.411286	0.558579
33	198	0.517998	0.678193	0.546194	0.571484	0.618279	0.851192	0.700736	0.610822	0.865124	0.484431	0.301253	0.274893	0.597878	0.487263	0.483386	0.608857
34	204	0.518125	0.716722	0.592016	0.550151	0.591823	0.862623	0.733384	0.660298	0.886709	0.494545	0.329085	0.355567	0.501372	0.502845	0.457819	0.420667
35	210	0.547984	0.729962	0.64687	0.632669	0.54134	0.866615	0.736212	0.652827	0.919628	0.511451	0.329285	0.385928	0.554298	0.517353	0.523971	0.598106
