# Supplementary material for: Emx2 regulates hair cell rearrangement but not positional identity within neuromasts
Source: eLife. 2020 Dec 30;9:e60432. doi: 10.7554/eLife.60432 (PMC7806267; doi:10.7554/eLife.60432)
Supplement: Figure 6—source data 2. [file elife-60432-fig6-data2.xlsx]

## Sheet: Sheet1
Figure 6-source data 2
Quantification of signal intensity of apical protrusion at the end of Rock phase among WT, emx2 LOF and emx2 GOF HCs.
sample #	signal intensity of protrsuion of WT at end of Roll phase	signal intensity of protrsuion of emx2 LOF at end of Roll phase	signal intensity of protrsuion of emx2 GOF at end of Roll phase
1	0.25762	0.443456	0.140783		ANOVA summary
2	0.227435	0.266212	0.10983		F	26.97
3	0.231006	0.330956	0.152942		P value	<0.0001
4	0.276873	0.455167	0.182036		P value summary	****
5	0.331263	0.429851	0.115209		Significant diff. among means (P < 0.05)?	Yes
6			0.161991		R squared	0.8058
					Brown-Forsythe test
					F (DFn, DFd)	1.214 (2, 13)
					P value	0.3285
					P value summary	ns
					Are SDs significantly different (P < 0.05)?	No
					Bartlett's test
					Bartlett's statistic (corrected)	4.853
					P value	0.0884
					P value summary	ns
					Are SDs significantly different (P < 0.05)?	No
					ANOVA table	SS	DF	MS	F (DFn, DFd)	P value
					Treatment (between columns)	0.1593	2	0.07964	F (2, 13) = 26.97	P<0.0001
					Residual (within columns)	0.03839	13	0.002953
					Total	0.1977	15
					Data summary
					Number of treatments (columns)	3
					Number of values (total)	16
					Dunnett's multiple comparisons test	Mean Diff.	95.00% CI of diff.	Significant?	Summary	Adjusted P Value	A-?
					WT vs. LOF	-0.1203	-0.2053 to -0.03525	Yes	**	0.0073	B	LOF
					WT vs. GOF	0.121	0.03962 to 0.2025	Yes	**	0.0052	C	GOF
					Test details	Mean 1	Mean 2	Mean Diff.	SE of diff.	n1	n2	q	DF
					WT vs. LOF	0.2648	0.3851	-0.1203	0.03437	5	5	3.5	13
					WT vs. GOF	0.2648	0.1438	0.121	0.03291	5	6	3.678	13
