# Supplementary material for: Emx2 regulates hair cell rearrangement but not positional identity within neuromasts
Source: eLife. 2020 Dec 30;9:e60432. doi: 10.7554/eLife.60432 (PMC7806267; doi:10.7554/eLife.60432)
Supplement: Figure 6—source data 3. [file elife-60432-fig6-data3.xlsx]

## Sheet: Sheet1
Figure 6-source data 3
Quantification of changes in the length of apical protrusion during the Rock Phase.
frame	time	WT_sample1	WT_sample2	WT_sample3	WT_sample4	WT_sample 5	LOF_1	LOF_2	LOF_3	LOF_4	LOF_5	gof_1	gof_2	gof_3	gof_4	gof_5
0	0	0.667	0.795	0.476	0.768	0.926	0.456	0.784	0.866	0.987	1.496	0.724	0.935	0.78	0.959	0.54
1	6	1.151	0.944	0.564	1.636	2.375	1.297	1.766	2.883	1.795	2.356	0.999	0.844	0.928	1.075	0.563
3	18	1.845	1.453	0.909	2.092	3.218	3.653	4.22	3.959	2.132	2.917	0.774	0.942	0.615	1.173	0.748
4	24	2.438	1.949	0.996	2.949	3.463	3.645	4.816	5.379	2.322	3.779	0.752	1.215	0.887	1.358	0.732
5	30	3.317	2.154	1.052	2.981	3.562	3.397	4.436	5.321	3.389	4.025	0.698	0.978	0.907	1.654	0.861
6	36	3.586	2.636	1.715	3.26	3.585	3.383	5.483	5.536	3.908	4.178	0.928	1.033	0.693	1.63	0.979
7	42	3.749	3.548	1.93	3.485	3.667	3.412	5.703	5.735	3.932	4.16	0.928	1.335	0.873	1.748	0.961
8	48	3.686	3.845	2.802	3.651	3.655	4.649	5.935	5.702	3.984	4.289	0.851	1.122	0.801	1.88	1.154
9	54	4.302	4.387	3.269	3.855	3.706	5.181	5.002	5.679	4.987	4.922	1.005	1.112	1.209	2.063	1.178
10	60	4.771	4.495	4.258	3.88	3.752	5.571	5.805	5.525	5.277	4.735	0.936	1.478	1.057	1.868	1.141
11	66	5.188	4.853	4.919	4.088	3.743	5.319	5.613	5.248	5.03	4.817	0.985	1.485	1.085	2.39	1.214
12	72	4.782	5.449	5.132	4.145	3.749	5.946	5.705	5.507	5.287	5.377	0.99	1.543	1.371	2.589	1.219
13	78	4.562	5.246	4.955	4.157	3.809	5.324	5.893	5.671	5.651	4.97	0.992	2.152	1.606	2.357	1.373
14	84	4.61	5.033	5.402	4.114	3.966	4.982	5.206	5.736	5.473	4.79	1.103	2.663	1.509	2.382	1.382
15	90	5.002	4.851	4.292	4.237	3.959	4.293	5.226	5.564	5.287	5.178	1.055	2.117	1.395	2.558	1.389
16	96	5.171	5.143	4.399	4.287	3.841	4.357	5.405	5.759	5.363	4.652	1.125	2.434	1.504	2.771	1.305
17	102	5.144	5.096	4.132	4.273	3.642	4.414	5.384	5.835	5.3	5.085	1.417	2.759	1.581	2.943	1.577
18	108	5.171	5.116	5.231	4.245	4.122	4.303	5.583	5.973	5.066	5.384	1.646	2.649	1.521	3.115	1.269
19	114	5.28	5.34	5.319	4.257	4.116	5.108	5.984	5.806	5.245	5.202	1.671	2.684	1.894	2.592	1.654
20	120	5.08	5.364	4.406	4.311	4.087	4.935	5.798	5.483	5.55	5.301	2.2	3.024	1.548	3.134	1.562
21	126	5.026	5.111	4.989	4.368	4.331	5.499	5.856	6.203	5.514	4.735	2.212	2.876	1.774	3.12	1.16
22	132	5.007	5.346	4.266	4.337	4.302	5.265	5.741	5.721	5.312	5.627	2.166	3.205	1.855	2.977	1.382
23	138	4.824	5.379	4.397	4.284	4.384	4.801	5.484	6.138	5.174	5.363	2.405	3.021	1.713	3.103	1.441
24	144	5.012	5.318	4.833	4.362	4.312	5.049	5.831	6.389	5.298	4.946	2.194	2.723	1.478	3.333	1.535
25	150	4.826	5.215	5.1	4.349	4.008	5.07	5.893	6.473	5.413	4.963	2.043	3.176	1.597	3.172	1.573
26	156	5.006	5.108	5.61	4.283	4.229	5.104	5.594	6.59	5.238	5.277	2.349	3.298	1.603	3.013	1.537
27	162	5.035	5.089	5.026	4.24	4.183	5.108	5.868	6.114	5.549	5.238	2.123	3.407	1.99	3.078	1.413
28	168	5.068	5.222	5.023	4.381	4.306	5.054	5.364	5.969	5.312	5.276	2.248	3.349	1.696	3.397	1.708
29	174	4.739	5.116	4.925	4.336	4.776	5.108	5.71	6.248	5.16	5.211	2.634	3.17	1.61	3.452	1.508
30	180	5.021	5.397	4.979	4.326	4.42	5.054	5.69	6.113	5.037	5.413	2.491	3.371	2.091	3.018	1.529
31	186	5.045	5.332	4.413	4.442	4.182	5.102	5.559	6.266	5.358	5.272	2.539	3.336	1.823	3.349	1.855
32	192	4.861	5.525	4.993	4.521	4.667	4.91	5.298	6.669	5.667	5.011	2.193	3.259	1.934	3.082	1.871
33	198	5.03	5.478	5.047	4.589	4.455	4.929	5.99	5.99	5.201	5.576	2.39	3.459	1.766	3.178	2.037
34	204	5.218	5.4	4.804	4.469	4.304	5.1065	5.596	5.542	5.557	5.527	2.51	3.502	2.082	3.148	1.992
35	210	5.097	5.626	4.935	4.604	4.489	4.895	5.782	5.751	5.432	5.378	2.83	3.65	1.631	3.074	2.187
