# Supplementary material for: Emx2 regulates hair cell rearrangement but not positional identity within neuromasts
Source: eLife. 2020 Dec 30;9:e60432. doi: 10.7554/eLife.60432 (PMC7806267; doi:10.7554/eLife.60432)
Supplement: Figure 6—source data 4. [file elife-60432-fig6-data4.xlsx]

## Sheet: Sheet1
		Figure 6-source data 4
		Quantification of the length of apical protrusion at the end of Rock phase among WT, emx2 LOF and emx2 GOF HCs.
	sample #	length of apical protrusion at end of Rock phase in WT	length of apical protrusion at end of Rock phase in LOF	length of apical protrusion at end of Rock phase in GOF
	1	5.002	4.293	1.103				ANOVA summary							Dunnett's multiple comparisons test	Mean Diff.	95.00% CI of diff.	Significant?	Summary	Adjusted P Value	A-?
	2	4.851	5.226	2.663				F	52.15						WT vs. LOF	-0.6414	-1.499 to 0.2166	No	ns	0.1487	B	LOF
	3	4.292	5.564	1.509				P value	<0.0001						WT vs. GOF	2.66	1.802 to 3.518	Yes	****	<0.0001	C	GOF
	4	3.959	5.178	2.382				P value summary	****
	5	4.237	5.287	1.382				Significant diff. among means (P < 0.05)?	Yes						Test details	Mean 1	Mean 2	Mean Diff.	SE of diff.	n1	n2	q	DF
								R squared	0.8968						WT vs. LOF	4.468	5.11	-0.6414	0.3429	5	5	1.871	12
															WT vs. GOF	4.468	1.808	2.66	0.3429	5	5	7.759	12
								Brown-Forsythe test
								F (DFn, DFd)	0.4673 (2, 12)
								P value	0.6376
								P value summary	ns
								Are SDs significantly different (P < 0.05)?	No
								Bartlett's test
								Bartlett's statistic (corrected)	0.7792
								P value	0.6773
								P value summary	ns
								Are SDs significantly different (P < 0.05)?	No
								ANOVA table	SS	DF	MS	F (DFn, DFd)	P value
								Treatment (between columns)	30.65	2	15.33	F (2, 12) = 52.15	P<0.0001
								Residual (within columns)	3.527	12	0.2939
								Total	34.18	14
								Data summary
								Number of treatments (columns)	3
								Number of values (total)	15
