# Supplementary material for: Emx2 regulates hair cell rearrangement but not positional identity within neuromasts
Source: eLife. 2020 Dec 30;9:e60432. doi: 10.7554/eLife.60432 (PMC7806267; doi:10.7554/eLife.60432)
Supplement: Figure 9—source data 1. [file elife-60432-fig9-data1.xlsx]

## Sheet: Sheet1
Figure_9-source data 1
Frequencies of Roll and NoRoll movements in vangl2 mutants.
	vangl2/emx2:Rep (Roll or Noroll)	Control (Roll / No Roll)
	no roll	no roll
	roll	roll
	roll	no roll		Roll	noroll	Marginal Row Totals
	no roll	no roll		WT	30 (23.45) [1.83]	23 (29.55) [1.45]	53
	no roll	no roll		Vang	20 (26.55) [1.62]	40 (33.45) [1.28]	60
	no roll	no roll		Marginal Column Totals	50	63	113 (Grand Total)
	no roll	no roll
	roll	roll
	no roll	roll		The chi-square statistic is 6.1774. The p-value is .012939. Significant at p < .05.
	no roll	no roll
	no roll	roll
	no roll	roll
	roll	no roll
	no roll	roll
	no roll	roll
	no roll	no roll
	no roll	no roll
	roll	no roll
	no roll	roll
	no roll	no roll
	roll	roll
	no roll	roll
	roll	noroll
	roll	roll
	no roll	roll
	roll	roll
	no roll	roll
	no roll	roll
	roll	roll
	no roll	roll
	no roll	no roll
	no roll	no roll
	roll	no roll
	no roll	noRoll
	no roll	roll
	no roll	roll
	no roll	roll
	no roll	roll
	no roll	no roll
	roll	roll
	roll	roll
	roll	roll
	no roll	roll
	roll	no roll
	no roll	roll
	no roll	no roll
	no roll	no roll
	no roll	no roll
	no roll	no roll
	no roll	roll
	roll	roll
	no roll	roll
	no roll	roll
	roll
	no roll
	roll
	no roll
	no roll
	roll
	roll
