# Supplementary material for: Emx2 regulates hair cell rearrangement but not positional identity within neuromasts
Source: eLife. 2020 Dec 30;9:e60432. doi: 10.7554/eLife.60432 (PMC7806267; doi:10.7554/eLife.60432)
Supplement: Figure 9—source data 2. [file elife-60432-fig9-data2.xlsx]

## Sheet: Sheet1
Figure 9-source data 2
Comparison of duration of Rock, Roll and R&R between controls and vangl2 mutants.
Vangl / Rock duration (min)	Vangl /Roll duration (min)	Vangl /R&R duration (min)	Cont/ Rock duration (min)	Cont / Roll duration (min)	Cont /R&R duration (min)
162	156	318	132	60	192
36	252	288	132	54	186
90	156	246	138	84	222
90	312	402	42	102	144
114	126	240	108	72	180
96	138	234	30	48	78
84	48	132	30	72	102
84	78	162	84	48	132
66	66	132	96	96	192
120	276	396	84	60	144
54	66	120	120	96	216
96	48	144	120	54	174
108	252	360	78	42	120
n.a	270		102	48	150
60	174	234	78	78	156
72	306	378	90	72	162
72	144	216	60	54	114
72	132	204	48	66	114
78	342	420	78	78	156
			36	90	126
			90	42	132
			66	60	126
			60	60	120
			78	78	156
			66	66	132
			72	60	132
			84	60	144
			48	66	114
